# Supplementary material for: Thermo and flex multi-functional array ionic sensor for a human adaptive device
Source: Royal Society of Chemistry journal article supplement (doi:10.1039/c9ra08188g), 2019-01-01
Supplement: c9ra08188g1.pdf [file c9ra08188g1.pdf]

**Supporting Data**

# Thermo and Flex Multi-Functional Array Ionic Sensor for Human Adaptive Device

Sukjin Jang,<sup>ab</sup> Daehwan Choi,<sup>ab</sup> Suk Yang,<sup>ab</sup> and Jang-Yeon Kwon<sup>\*ab</sup>

---

<sup>a</sup> School of Integrated Technology, Yonsei University, Incheon 21983, Republic of Korea

<sup>b</sup> Yonsei Institute of Convergence Technology, Yonsei University, Incheon 21983, Republic of Korea

---

**Corresponding author:**

Prof. Jang-Yeon Kwon

E-mail: jangyeon@yonsei.ac.kr

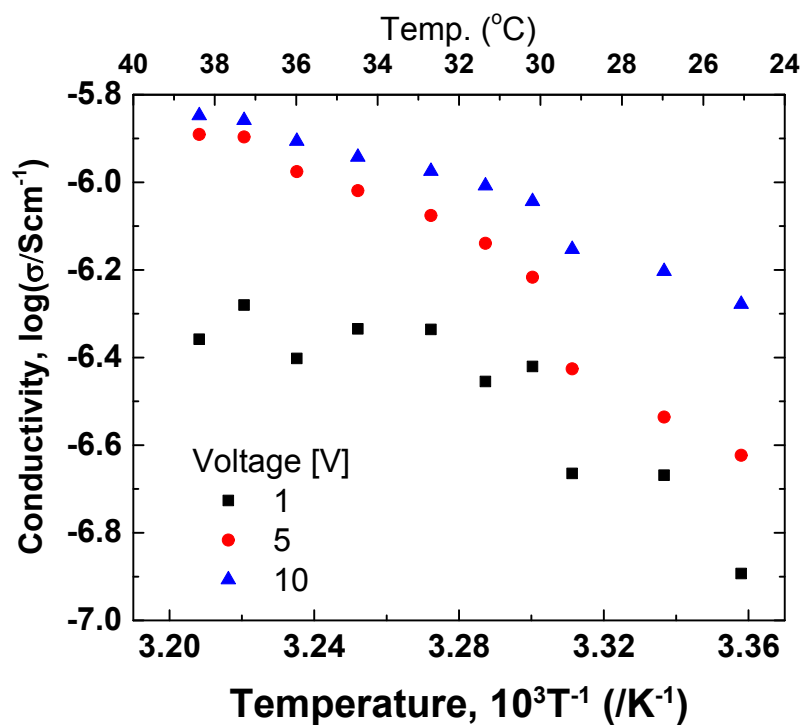

**Supporting Figure 1** Relationship between temperature and conductivity in resistive type sensor.

At 10 V and 5 V, the result is linear with respect to  $K^{-1}$ , which satisfies the Arrhenius equation well.

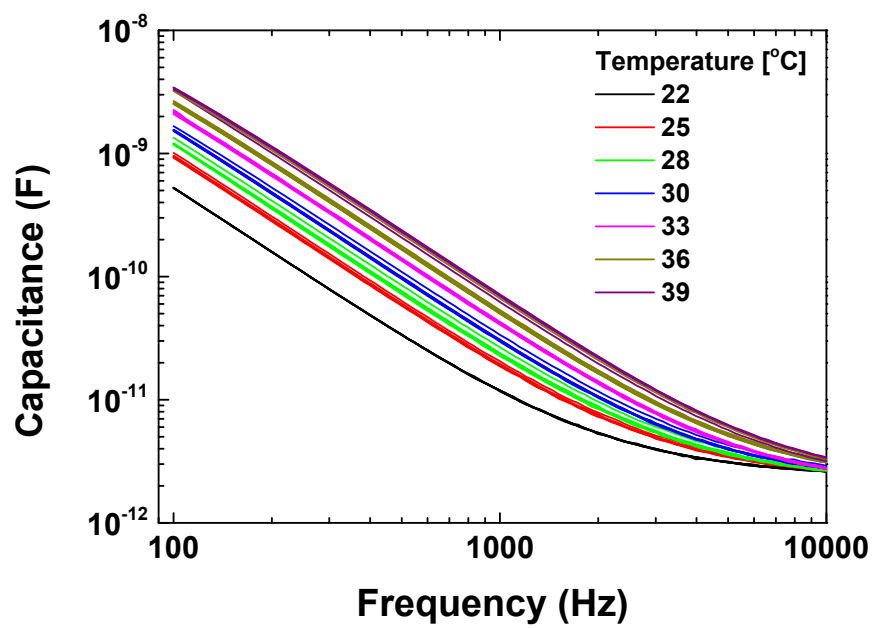

**Supporting Figure 2** Relationship between capacitance and frequency as temperature.

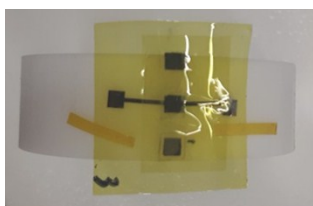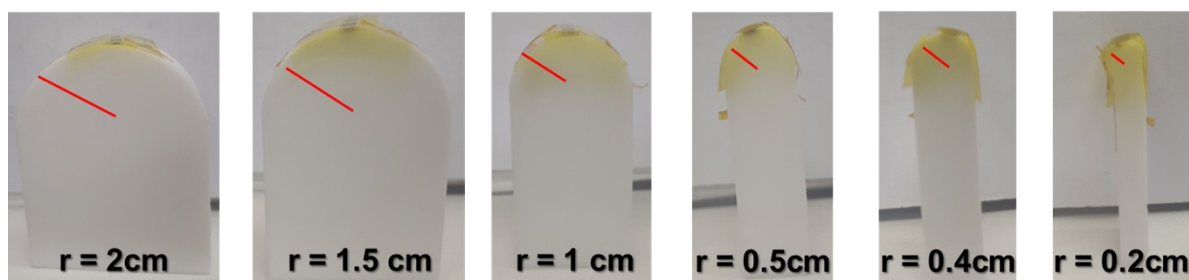

**Supporting Figure 3** A semicircular curve made of Teflon. The radii are 2, 1.5, 1, 0.5, 0.4, and 0.2 cm, respectively. The i-TPU was covered and bent over it.

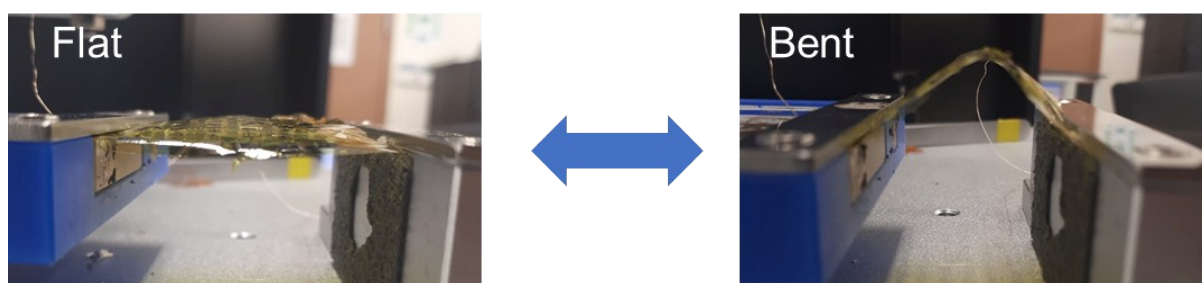

**Supporting Figure 4** Image of bending test using bending machine.
